# Supplementary material for: Management of BRCA Tumour Testing in an Integrated Molecular Tumour Board Multidisciplinary Model
Source: PubMed Central journal article supplement (PMC9026437; doi:10.3389/fonc.2022.857515), 2022-04-08

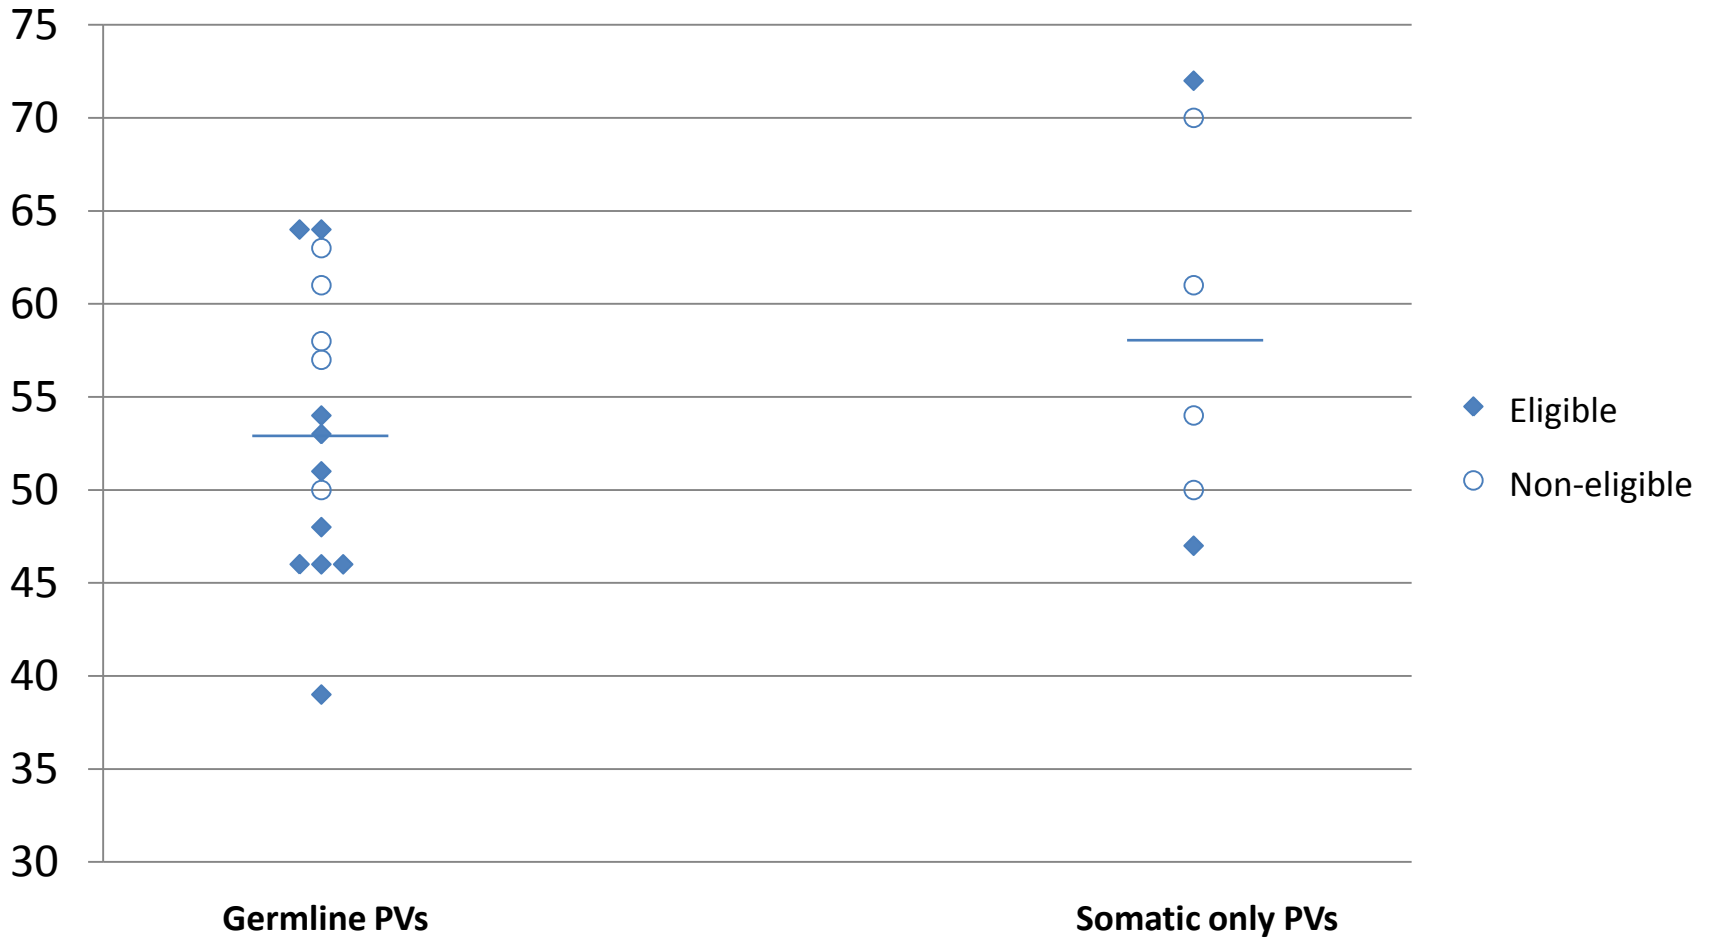

Supplement: Image_1.pdf [file Image_1.pdf]
